# Supplementary material
Source: publisher figshare collection journal article supplement (https://gsajournals.figshare.com/ndownloader/files/18900869)
Supplement: Supplementary file 1 [file 18900869]

## Sheet: Sheet1
Table S4. C. elegans WGS rDNA copy number estimates compared using different alignment methods: Bowtie2 or BWA-MEM
		GC content correction
		10 ng						50 ng								Absolute value of percent WGS estimate differs from CHEF-based estimate
		Rep 1		Rep 2		Rep 3		Rep 1		Rep 2		Rep 3
Strain	Ave CHEF-based estimate	Bowtie2	BWA-MEM	Bowtie2	BWA-MEM	Bowtie2	BWA-MEM	Bowtie2	BWA-MEM	Bowtie2	BWA-MEM	Bowtie2	BWA-MEM			Bowtie2	BWA-MEM	Bowtie2	BWA-MEM	Bowtie2	BWA-MEM	Bowtie2	BWA-MEM	Bowtie2	BWA-MEM	Bowtie2	BWA-MEM
MY16	67.75	63.8163	61.7463	64.0935	62.1032	78.913	76.4778	87.2348	83.3872	88.841	83.9764	81.0834	78.3354			0.0580616	0.0886152	0.0539701	0.083348	0.164767	0.128824	0.287599	0.230808	0.311306	0.239503	0.196804	0.156242
JU775	69.6759	92.8193	87.7808	78.8903	76.417	96.4463	92.453	112.391	105.305	109.921	103.252	101.737	96.985			0.332157	0.259845	0.132246	0.0967491	0.384213	0.3269	0.61306	0.511361	0.577602	0.481884	0.460143	0.391945
ED3042	106.944	106.063	102.829	90.4832	88.7069	129.124	126.443	155.223	145.962	151.451	143.313	140.942	137.389			0.00823985	0.038485	0.153924	0.170533	0.207394	0.18232	0.451439	0.364843	0.416168	0.340067	0.317902	0.284672
ED3040	153.796	154.154	150.414	138.196	134.557	187.315	185.199	223.961	212.553	215.627	207.225	203.992	199.462			0.00232702	0.0219946	0.101437	0.125096	0.217944	0.204182	0.456218	0.382044	0.402032	0.347396	0.326381	0.296925
MY6	215.741	194.474	186.445	172.819	168.477	247.911	241.001	285.291	270.026	283.199	269.504	265.152	254.818			0.0985753	0.135792	0.19895	0.219074	0.149117	0.117086	0.322377	0.251621	0.312684	0.249201	0.229032	0.18113
MY14	252.083	258.806	247.518	201.901	194.801	272.684	260.664	318.985	297.556	319.313	297.418	290.735	279.184			0.026668	0.0181084	0.19907	0.227237	0.0817214	0.0340406	0.265396	0.180389	0.266697	0.17984	0.153328	0.107506
PX174	322.917	252.043	244.805	185.809	181.183	304.408	297.298	343.328	331.29	335.056	320.73	316.022	308.309			0.219479	0.241894	0.424592	0.438916	0.0573168	0.0793363	0.0632104	0.0259309	0.0375918	0.006773	0.0213502	0.0452381
MY1	412.037	359.022	349.821	322.932	315.555	426.767	415.4	489.224	459.843	475.442	454.366	449.353	433.592			0.128665	0.150997	0.216255	0.234158	0.0357499	0.00816208	0.187331	0.116024	0.153882	0.10273	0.0905642	0.0523131
															10ng Ave % off bowtie		0.152202				50ng Ave % off bowtie		0.288337
															10ng Ave % off BWA-MEM		0.15132				50ng Ave % off BWA-MEM		0.230266
C. elegans WGS rDNA copy number estimates compared with or without adapter sequence trimming of FASTQs
		GC content correction
Strain	Ave CHEF-based estimate	10ng-1 no trim	10ng-1 with trim	10ng-2 no trim	10ng-2 with trim	10ng-3 no trim	10ng-3 with trim	50ng-1 no trim	50ng-1 with trim	50ng-2 no trim	50ng-2 with trim	50ng-3 no trim	50ng-3 with trim			10ng-1	10ng-1 trim	10ng-2	10ng-2 trim	10ng-3	10ng-3 trim	50ng-1	50ng-1 trim	50ng-2	50ng-2 trim	50ng-3	50ng-3 trim
MY16	67.75	63.8163	63.305	64.0935	63.8024	78.913	79.0481	87.2348	86.2036	88.841	87.5558	81.0834	80.6646			0.0580616	0.0656084	0.0539701	0.0582672	0.164767	0.166762	0.287599	0.272378	0.311306	0.292336	0.196804	0.190622
JU775	69.6759	92.8193	91.9131	78.8903	78.2368	96.4463	95.8126	112.391	109.981	109.921	107.432	101.737	101.09			0.332157	0.319151	0.132246	0.122867	0.384213	0.375117	0.61306	0.578465	0.577602	0.541875	0.460143	0.450866
ED3042	106.944	106.063	104.69	90.4832	89.8302	129.124	128.589	155.223	150.744	151.451	148.093	140.942	140.116			0.00823985	0.0210823	0.153924	0.160029	0.207394	0.20239	0.451439	0.40955	0.416168	0.384763	0.317902	0.310171
ED3040	153.796	154.154	152.607	138.196	136.722	187.315	187.432	223.961	220.429	215.627	212.635	203.992	202.807			0.00232702	0.00773212	0.101437	0.11102	0.217944	0.2187	0.456218	0.433254	0.402032	0.382579	0.326381	0.318671
MY6	215.741	194.474	191.771	172.819	171.671	247.911	248.31	285.291	282.259	283.199	278.176	265.152	261.627			0.0985753	0.111103	0.19895	0.204271	0.149117	0.150964	0.322377	0.308324	0.312684	0.289399	0.229032	0.21269
MY14	252.083	258.806	254.877	201.901	200.359	272.684	271.463	318.985	312.693	319.313	312.857	290.735	289.753			0.026668	0.0110819	0.19907	0.205187	0.0817214	0.0768766	0.265396	0.240437	0.266697	0.241085	0.153328	0.149435
PX174	322.917	252.043	249.266	185.809	183.352	304.408	302.94	343.328	337.648	335.056	329.747	316.022	313.68			0.219479	0.22808	0.424592	0.4322	0.0573168	0.0618647	0.0632104	0.0456189	0.0375918	0.0211516	0.0213502	0.0286029
MY1	412.037	359.022	356.282	322.932	318.616	426.767	425.919	489.224	480.22	475.442	469.463	449.353	444.527			0.128665	0.135315	0.216255	0.226731	0.0357499	0.0336904	0.187331	0.165477	0.153882	0.13937	0.0905642	0.0788511
															10ng Ave % off no trim		0.152202				50ng Ave % off no trim		0.288337
															10ng Ave % off trimming		0.15442				50ng Ave % off trimming		0.270249
